# Supplementary material
Source: MDPI journal article supplement (https://www.mdpi.com/2076-3263/13/5/140)
Supplement: s1 [file s1]

*Electronic Supplementary Information*

# Does microbial and faunal pattern correspond to dynamics in hydrogeology and hydrochemistry? Comparative study of two isolated groundwater ecosystems in Münsterland, Germany

Sura Abdulghani Alqaragholi <sup>1, \*</sup>, Wael Kanoua <sup>2</sup>, Harald Strauss <sup>1</sup> and Patricia Göbel <sup>1</sup>

<sup>1</sup> Institute of Geology and Paleontology, University of Münster, 48149 Münster, Germany; pgoebel@wwu.de (P.G.) ; hstrauss@uni-muenster.de (H.S.)

<sup>2</sup> Department of Petroleum Engineering, Chemical and Petroleum Engineering Faculty, AL Baath University, Homs, Syria; wael\_kanoua@yahoo.com

\* Correspondence: s\_alqa01@uni-muenster.de

**Table S1.** Descriptive statistics of Baumberge on three sampling occasions.

| Parameters                       | Unit                | Minimum               | Maximum              | Mean                 | Std. Deviation       |
|----------------------------------|---------------------|-----------------------|----------------------|----------------------|----------------------|
| Temp.                            | °C                  | 9.7                   | 10.5                 | 9.99                 | 0.25027              |
| pH                               |                     | 7                     | 8                    | 7.2575               | 0.27526              |
| DO                               | mg/L                | 4.19                  | 8.59                 | 6.1617               | 1.31906              |
| EC                               | μS/cm               | 700                   | 758                  | 731.75               | 16.581               |
| $\dot{V}$                        | L/s                 | 9.504                 | 27.216               | 19.1448              | 6.053883             |
| $h_{GW}$                         | m a.s.l             | 114.24                | 122.82               | 117.12               | 4.20981              |
| Detritus                         |                     | 1                     | 3                    | 1.83                 | 0.835                |
| GFI                              |                     | 0.226201              | 5.782226             | 1.328724             | 1.517958             |
| $sf/\dot{V}$                     | Ind./m <sup>3</sup> | 0                     | 2.964963             | 0.630118             | 0.937479             |
| $sb/\dot{V}$                     | Ind./m <sup>3</sup> | 0                     | 1.982596             | 0.307739             | 0.551054             |
| Ca <sup>2+</sup>                 | mg/L                | 154.6                 | 172.2                | 162.942              | 4.808                |
| Mg <sup>2+</sup>                 | mg/L                | 2.914                 | 4.765                | 3.83475              | 0.600612             |
| Na <sup>+</sup>                  | mg/L                | 5.05                  | 9.89                 | 7.6158               | 1.68479              |
| K <sup>+</sup>                   | mg/L                | 0.996                 | 1.282                | 1.12192              | 0.09991              |
| Al <sup>3+</sup>                 | mg/L                | 0.0003                | 0.0218               | 0.007108             | 0.007001             |
| Sr                               | mg/L                | 0.781                 | 1.142                | 0.95917              | 0.116446             |
| Fe <sup>2+</sup>                 | mg/L                | 0.0011                | 0.0651               | 0.010858             | 0.01779              |
| SO <sub>4</sub> <sup>-</sup>     | mg/L                | 41.702                | 50.495               | 46.72767             | 2.691285             |
| Cl <sup>-</sup>                  | mg/L                | 12.589                | 25                   | 18.89633             | 4.226788             |
| HCO <sub>3</sub> <sup>-</sup>    | mg/L                | 342.21                | 373.482              | 355.5092             | 9.756656             |
| F <sup>-</sup>                   | mg/L                | 0.081                 | 0.116                | 0.09783              | 0.011869             |
| NO <sub>3</sub> <sup>-</sup>     | mg/L                | 29.272                | 42.951               | 36.97725             | 4.700051             |
| PO <sub>4</sub> <sup>3-</sup>    | mg/L                | 0                     | 0.519                | 0.18783              | 0.153878             |
| SiO <sub>3</sub>                 | mg/L                | 4.6                   | 14.01                | 8.17175              | 4.064251             |
| δ <sup>2</sup> H <sub>H2O</sub>  | ‰                   | -54.34                | -50.06               | -52.2058             | 1.36129              |
| δ <sup>18</sup> O <sub>H2O</sub> | ‰                   | -7.97                 | -7.3                 | -7.65                | 0.21187              |
| δ <sup>13</sup> C <sub>DIC</sub> | ‰                   | -15.26                | -14.17               | -14.75               | 0.34317              |
| δ <sup>34</sup> S <sub>SO4</sub> | ‰                   | -5.2                  | -1.9                 | -3.2659              | 1.152114             |
| δ <sup>18</sup> O <sub>SO4</sub> | ‰                   | 1.7                   | 3                    | 2.318722             | 0.363102             |
| δ <sup>15</sup> N <sub>NO3</sub> | ‰                   | 2.83                  | 7.81                 | 5.79                 | 1.76                 |
| δ <sup>18</sup> O <sub>NO3</sub> | ‰                   | 1.67                  | 8.26                 | 6.07                 | 1.86                 |
| Biomass                          | cells/L             | 6.20x10 <sup>6</sup>  | 1.53x10 <sup>8</sup> | 6.21x10 <sup>7</sup> | 4.19x10 <sup>7</sup> |
| Activity                         | pM                  | 9.70x10 <sup>-1</sup> | 6.79x10 <sup>2</sup> | 1.96x10 <sup>2</sup> | 2.32x10 <sup>2</sup> |

**Table S2.** Descriptive statistics of Schöppinger Berg on three sampling occasions.

| Parameters                       | Unit                | Minimum              | Maximum              | Mean                 | Std. Deviation       |
|----------------------------------|---------------------|----------------------|----------------------|----------------------|----------------------|
| Temp.                            | °C                  | 10                   | 12                   | 10.842               | 0.7914               |
| pH                               |                     | 7                    | 7.5                  | 7.233                | 0.1614               |
| DO                               | mg/L                | 4.77                 | 8.5                  | 7.11                 | 1.00396              |
| EC                               | μS/cm               | 749                  | 824                  | 777.83               | 23.571               |
| $\dot{V}$                        | L/s                 | 1.04                 | 48.38                | 15.315               | 20.17273             |
| $h_{GW}$                         | m a.s.l             | 114.24               | 122.82               | 117.12               | 4.20981              |
| Detritus                         |                     | 0                    | 2                    | 0.83                 | 0.577                |
| GFI                              |                     | 0                    | 2.566032             | 0.728908             | 0.741029             |
| $sf/\dot{V}$                     | Ind./m <sup>3</sup> | 0                    | 1.45                 | 0.5208               | 0.4699               |
| $sb/\dot{V}$                     | Ind./m <sup>3</sup> | 0                    | 0.96                 | 0.2858               | 0.28147              |
| Ca <sup>2+</sup>                 | mg/L                | 168.5                | 187                  | 173.842              | 4.8967               |
| Mg <sup>2+</sup>                 | mg/L                | 2.7                  | 4.68                 | 3.8117               | 0.62855              |
| Na <sup>+</sup>                  | mg/L                | 6.27                 | 10.91                | 8.78                 | 1.51711              |
| K <sup>+</sup>                   | mg/L                | 1.16                 | 1.98                 | 1.5167               | 0.25896              |
| Al <sup>3+</sup>                 | mg/L                | 0.0003               | 0.0262               | 0.005317             | 0.007394             |
| Sr                               | mg/L                | 0.735                | 1.361                | 1.02892              | 0.204436             |
| Fe <sup>2+</sup>                 | mg/L                | 0.0011               | 0.0249               | 0.005292             | 0.006806             |
| SO <sub>4</sub> <sup>-</sup>     | mg/L                | 46.02                | 59.74                | 50.3025              | 4.43876              |
| Cl <sup>-</sup>                  | mg/L                | 23.19                | 35.64                | 29.5792              | 3.54744              |
| HCO <sub>3</sub> <sup>-</sup>    | mg/L                | 317.2                | 393.97               | 346.7467             | 21.72613             |
| F <sup>-</sup>                   | mg/L                | 0.08                 | 0.23                 | 0.1058               | 0.04337              |
| NO <sub>3</sub> <sup>-</sup>     | mg/L                | 40.56                | 65.86                | 53.5342              | 7.37495              |
| PO <sub>4</sub> <sup>3-</sup>    | mg/L                | 0                    | 0.57                 | 0.205                | 0.18353              |
| SiO <sub>3</sub>                 | mg/L                | 4.18                 | 24.42                | 9.1917               | 5.85418              |
| δ <sup>2</sup> H <sub>H2O</sub>  | ‰                   | -55.49               | -49.8                | -52.6775             | 1.76712              |
| δ <sup>18</sup> O <sub>H2O</sub> | ‰                   | -8.09                | -7.4                 | -7.7475              | 0.24581              |
| δ <sup>13</sup> C <sub>DIC</sub> | ‰                   | -15.26               | -14.17               | -14.77               | 2.4486               |
| δ <sup>34</sup> S <sub>SO4</sub> | ‰                   | -6.07                | -1.85                | -3.4958              | 1.43331              |
| δ <sup>18</sup> O <sub>SO4</sub> | ‰                   | 1.9                  | 3.02                 | 2.6358               | 0.3655               |
| δ <sup>15</sup> N <sub>NO3</sub> | ‰                   | 3.72                 | 7.96                 | 6.13                 | 1.33                 |
| δ <sup>18</sup> O <sub>NO3</sub> | ‰                   | 1.46                 | 6.81                 | 4.56                 | 1.55                 |
| Biomass                          | cells/L             | 1.41x10 <sup>6</sup> | 7.38x10 <sup>8</sup> | 1.01x10 <sup>8</sup> | 2.02x10 <sup>8</sup> |
| Activity                         | pM                  | 1.7x10 <sup>3</sup>  | 1.74x10 <sup>3</sup> | 3.75x10 <sup>2</sup> | 5.74x10 <sup>2</sup> |

**Table S3.** Spearman correlation of BB, n= 12 samples of 30 variables, considering a significance level of  $p \leq 0.01$ .

[illegible]

**Table S4.** Spearman correlation of SB, n= 12 samples of 30 variables, considering a significance level of  $p \leq 0.01$ .

|                                     | DO     | EC    | V     | $h_{\text{low}}$ | Detritus | GR     | sf/V   | db/V   | Ca <sup>2+</sup> | Mg <sup>2+</sup> | Na <sup>+</sup> | K <sup>+</sup> | Al <sup>3+</sup> | Sr     | Fe <sup>3+</sup> | SO <sub>4</sub> <sup>2-</sup> | Cl     | HCO <sub>3</sub> <sup>-</sup> | F      | NO <sub>3</sub> <sup>-</sup> | PO <sub>4</sub> <sup>3-</sup> | SiO <sub>2</sub> | U <sub>2</sub> H <sub>5</sub> SiO <sub>3</sub> | U <sup>6+</sup> O <sub>2</sub> (aq) | U <sup>5+</sup> O <sub>2</sub> (aq) | U <sup>4+</sup> O <sub>2</sub> (aq) | U <sup>3+</sup> O <sub>2</sub> (aq) | TCC    | ATP   |       |       |       |       |
|-------------------------------------|--------|-------|-------|------------------|----------|--------|--------|--------|------------------|------------------|-----------------|----------------|------------------|--------|------------------|-------------------------------|--------|-------------------------------|--------|------------------------------|-------------------------------|------------------|------------------------------------------------|-------------------------------------|-------------------------------------|-------------------------------------|-------------------------------------|--------|-------|-------|-------|-------|-------|
| Temp.                               | -0.232 | 62.3* |       | 0.074            | 0.105    | -65.7* | -0.168 | -0.397 | -0.471           | 65.1*            | 0.242           | 0.483          | 0.533            | -0.1   | 0.313            | -0.284                        | 595*   | 0.57                          | -0.271 | 0.029                        | 0.123                         | 0.351            | -0.174                                         | -0.055                              | 0.153                               | -6.30*                              | -680*                               | 0.199  | 0.185 |       |       |       |       |
| DO                                  |        |       | -0.26 | 0.542            | 0.148    | 0.441  | 0.322  | -0.323 | -0.323           | 0.012            | -0.355          | -0.302         | -0.354           | -0.517 | 0.366            | -0.463                        | 0.149  | -0.439                        | -0.127 | -0.133                       | -0.069                        | 0.862            | -0.379                                         | 0.007                               | -0.372                              | -0.482                              | -0.109                              | 0.396  | 0.46  | 0.07  | 0.446 |       |       |
| EC                                  |        |       |       | -0.342           | 0.118    | -71.9* | -0.423 | -0.299 | -0.249           | 595**            | 0.021           | 0.168          | 648*             | 0.021  | 0.168            | 648*                          | 0.021  | 0.168                         | 648*   | 0.021                        | 0.168                         | 648*             | 0.021                                          | 0.168                               | 648*                                | 0.021                               | 0.168                               | 648*   | 0.021 | 0.168 | 0.46  | 0.07  | 0.446 |
| V                                   |        |       |       |                  | 0.164    | 0.401  | 0.348  | -0.397 | -0.353           | -0.3             | -0.3            | -0.155         | -0.399           | 0.373  | -695*            | 0.351                         | -0.026 | 0.311                         | -0.497 | 0.054                        | 954**                         | -0.299           | -0.152                                         | -0.392                              | -0.458                              | 0.039                               | 0.554                               | 0.299  | 0.462 | 0.351 | 0.07  | 0.446 |       |
| Detritus                            |        |       |       |                  |          | 0.16   | -0.168 | -0.282 | -0.326           | -0.089           | 62.1*           | 0.582          | 0.459            | 839**  | 0.325            | 705*                          | 0.163  | 0.163                         | 0.118  | -0.446                       | 0.074                         | -757**           | -0.361                                         | -0.946**                            | -0.503                              | 0.414                               | -0.207                              | -0.415 | 0.356 | 877** | 0.07  | 0.446 |       |
| GR                                  |        |       |       |                  |          |        |        |        |                  |                  |                 |                |                  |        |                  |                               |        |                               |        |                              |                               |                  |                                                |                                     |                                     |                                     |                                     |        |       |       |       |       |       |
| sf/V                                |        |       |       |                  |          |        |        |        |                  |                  |                 |                |                  |        |                  |                               |        |                               |        |                              |                               |                  |                                                |                                     |                                     |                                     |                                     |        |       |       |       |       |       |
| db/V                                |        |       |       |                  |          |        |        |        |                  |                  |                 |                |                  |        |                  |                               |        |                               |        |                              |                               |                  |                                                |                                     |                                     |                                     |                                     |        |       |       |       |       |       |
| Ca <sup>2+</sup>                    |        |       |       |                  |          |        |        |        |                  |                  |                 |                |                  |        |                  |                               |        |                               |        |                              |                               |                  |                                                |                                     |                                     |                                     |                                     |        |       |       |       |       |       |
| Mg <sup>2+</sup>                    |        |       |       |                  |          |        |        |        |                  |                  |                 |                |                  |        |                  |                               |        |                               |        |                              |                               |                  |                                                |                                     |                                     |                                     |                                     |        |       |       |       |       |       |
| Na <sup>+</sup>                     |        |       |       |                  |          |        |        |        |                  |                  |                 |                |                  |        |                  |                               |        |                               |        |                              |                               |                  |                                                |                                     |                                     |                                     |                                     |        |       |       |       |       |       |
| K <sup>+</sup>                      |        |       |       |                  |          |        |        |        |                  |                  |                 |                |                  |        |                  |                               |        |                               |        |                              |                               |                  |                                                |                                     |                                     |                                     |                                     |        |       |       |       |       |       |
| Al <sup>3+</sup>                    |        |       |       |                  |          |        |        |        |                  |                  |                 |                |                  |        |                  |                               |        |                               |        |                              |                               |                  |                                                |                                     |                                     |                                     |                                     |        |       |       |       |       |       |
| Sr                                  |        |       |       |                  |          |        |        |        |                  |                  |                 |                |                  |        |                  |                               |        |                               |        |                              |                               |                  |                                                |                                     |                                     |                                     |                                     |        |       |       |       |       |       |
| Fe <sup>3+</sup>                    |        |       |       |                  |          |        |        |        |                  |                  |                 |                |                  |        |                  |                               |        |                               |        |                              |                               |                  |                                                |                                     |                                     |                                     |                                     |        |       |       |       |       |       |
| SO <sub>4</sub> <sup>2-</sup>       |        |       |       |                  |          |        |        |        |                  |                  |                 |                |                  |        |                  |                               |        |                               |        |                              |                               |                  |                                                |                                     |                                     |                                     |                                     |        |       |       |       |       |       |
| Cl                                  |        |       |       |                  |          |        |        |        |                  |                  |                 |                |                  |        |                  |                               |        |                               |        |                              |                               |                  |                                                |                                     |                                     |                                     |                                     |        |       |       |       |       |       |
| HCO <sub>3</sub> <sup>-</sup>       |        |       |       |                  |          |        |        |        |                  |                  |                 |                |                  |        |                  |                               |        |                               |        |                              |                               |                  |                                                |                                     |                                     |                                     |                                     |        |       |       |       |       |       |
| F                                   |        |       |       |                  |          |        |        |        |                  |                  |                 |                |                  |        |                  |                               |        |                               |        |                              |                               |                  |                                                |                                     |                                     |                                     |                                     |        |       |       |       |       |       |
| NO <sub>3</sub> <sup>-</sup>        |        |       |       |                  |          |        |        |        |                  |                  |                 |                |                  |        |                  |                               |        |                               |        |                              |                               |                  |                                                |                                     |                                     |                                     |                                     |        |       |       |       |       |       |
| PO <sub>4</sub> <sup>3-</sup>       |        |       |       |                  |          |        |        |        |                  |                  |                 |                |                  |        |                  |                               |        |                               |        |                              |                               |                  |                                                |                                     |                                     |                                     |                                     |        |       |       |       |       |       |
| U <sup>6+</sup> O <sub>2</sub> (aq) |        |       |       |                  |          |        |        |        |                  |                  |                 |                |                  |        |                  |                               |        |                               |        |                              |                               |                  |                                                |                                     |                                     |                                     |                                     |        |       |       |       |       |       |
| U <sup>5+</sup> O <sub>2</sub> (aq) |        |       |       |                  |          |        |        |        |                  |                  |                 |                |                  |        |                  |                               |        |                               |        |                              |                               |                  |                                                |                                     |                                     |                                     |                                     |        |       |       |       |       |       |
| U <sup>4+</sup> O <sub>2</sub> (aq) |        |       |       |                  |          |        |        |        |                  |                  |                 |                |                  |        |                  |                               |        |                               |        |                              |                               |                  |                                                |                                     |                                     |                                     |                                     |        |       |       |       |       |       |
| U <sup>3+</sup> O <sub>2</sub> (aq) |        |       |       |                  |          |        |        |        |                  |                  |                 |                |                  |        |                  |                               |        |                               |        |                              |                               |                  |                                                |                                     |                                     |                                     |                                     |        |       |       |       |       |       |
| TCC                                 |        |       |       |                  |          |        |        |        |                  |                  |                 |                |                  |        |                  |                               |        |                               |        |                              |                               |                  |                                                |                                     |                                     |                                     |                                     |        |       |       |       |       |       |
